# Supplementary material for: The American Monsoon System in HadGEM3.0 and UKESM1 CMIP6 simulations
Source: Copernicus journal article supplement (doi:10.5194/wcd-2020-8), 2020-03-19
Supplement: Supplementary file [file wcd-2020-8-AC2-supplement.pdf]

# Response to Referee #1

García-Franco, J.L., Gray LJ, Osprey S.

*Atmospheric, Oceanic and Planetary Physics, Department of Physics, University of Oxford. Parks Road Oxford, United Kingdom OX1 3PU email: jorge.garcia-franco@physics.ox.ac.uk*

---

---

We thank Reviewer 1 for the positive and constructive comments on the manuscript. We agree that this analysis is valuable for understanding the model performance of the UKMO models in a relatively less studied monsoon region. We now address each of your comments (in blue), highlighting the changes done to the manuscript as a result of your comment (in purple). In short, we have identified two major concerns that you presented and addressed them by including the AMIP simulation in all the analyses, to better understand the role of SSTs biases, as well as further analysing ENSO characteristics and the impact of ENSO diversity on the teleconnections to these monsoon systems by including a figure in the manuscript showing the different simulated and observed responses to the different types of ENSO events.

## 1. Specific comments

Line 8: The abstract describes that “[the model has] a stronger intraseasonal variation than observed”. Note that intraseasonal variability (in the way that most readers will understand the term, i.e. the Madden-Julian Oscillation or Boreal Summer Intraseasonal Oscillation) is not at all examined in this study. The authors are really describing aspects of the annual cycle (e.g. the mid-season drying). Thus, the wording here needs to be changed to avoid the language of intraseasonal variability. (See also later similar comment.)

The revised manuscript has changed the language to specify that these models have a stronger difference between the two peaks of precipitation and the mid-season dry period.

Line 9: While the Atlantic ITCZ is assessed, what of the SACZ? Is it relevant for such a study of the South American monsoon system?

The SACZ is very relevant as a major driver of variability in precipitation and circulation in the SAMS. We have addressed your comment by adding a supplementary figure comparing the modelled and simulated SACZ spatial patterns and seasonal cycles, although the abstract makes no mention of this. This figure is now mentioned in the manuscript in section 3.2 as follows:

The South Atlantic Convergence Zone (SACZ) is a northwest-southeast oriented band of convection and is a prominent influence on the South American Monsoon mean and extreme rainfall (Carvalho et al., 2004; Marengo et al., 2012). UKESM1 and GC3 appear to reasonably simulate the spatial pattern of active SACZ days and the seasonal cycle of SACZ activity (Figure S2).

Line 12: I think it is fair to say that ENSO characteristics (amplitude, frequency, longitudinal position, meridional spread, pattern, skewness...) are not at all assessed in this study. Thus, a more accurate form of

words is needed here in order to avoid giving thereader such a misconception, e.g. revised wording should focus on the AMS responseto ENSO.

The wording has been changed to focus on the teleconnections and the response of the AMS to ENSO. However, the characteristics of ENSO in the models, such as those mentioned by the reviewer are in good agreement with observations. For example, Menary et al. (2018) showed that the power spectrum of ENSO agrees better with the observed HadSST than most CMIP5 and CMIP3 models. We discuss this further in a reply to another comment below.

Line 15/16: Instead of “between the two model configurations”, in the abstract the sentence should be worded to emphasize the scientific (rather than technical) meaning of this, namely that Earth System processes appear to make no difference to the monsoon simulation.

Done.

Line 16: At this stage the various resolutions involved have not been described so the use of the term “medium resolution” may confuse the reader, since it naturally implies there has been a comparison made with both lower and higher resolutions. Being familiar with the model framework used, I know that there is a higher resolutionversion of the HadGEM3 model although it is not studied here. The authors need to rethink their terminology for this description. (See also later comments.) In addition,the resolutions used need to be explained in the abstract since they mean very different things to different readers (and their definition also changes with as this article ages).

We now use the terminology used in previous papers (e.g Menary et al., 2018) using the HadGEM3 model at N96 and N216 resolution, referring to these runs as low and medium-resolution. The term ”high-resolution” is now erased from the manuscript as to avoid possible confusion with higher resolution versions of the MOHC models.

Line 25/26: In an analogous fashion, what about the parts of South America north of the equator and their annual cycle? Can they be aligned to the NAMS?

While parts of southern Central America, e.g., Panama and northern South America, e.g., Colombia, may fit the definition of global monsoon, characterised by a strong seasonal contrast in precipitation, the regions experience a slightly different seasonal cycle, as they are transition zones between the North and South American monsoon with significant rainfall rates in the fall and spring season. Perhaps for this, or other historic reasons, these regions are excluded from North and South American Monsoon literature (Adams and Comrie, 1997, Arritt et al., 2000, Vera et al., 2006, Jones and Carvalho, 2013, Geil et al., 2013), and they are rarely discussed in this manuscript. However, the manuscript does clarify this by stating that the manuscript uses the standard definitions for the North and South American Monsoon, and additionally the MSD region. The manuscript now reads:

This study uses the definitions for the North and South American Monsoons as previous studies (Vera et al., 2006; Marengo et al., 2012), with additional analysis on the MSD of southern Mexico and Central America (Magaña et al., 1999; Perdigón-Morales et al., 2018).

Line 63: How have CMIP5 models misrepresented the magnitude of the seasonal cycle? Are they systematic under- or over-estimations, or a mixture depending on the model?

The manuscript now clarifies this point. CMIP5 models showed an earlier, but clearly observed, onset date, but the retreat date was unclear from precipitation time-series, due to problems in simulating the large and regional-scale processes associated with the retreat, i.e., the displacement of the subtropical jet. We have thus changed this paragraph as follows:

The CMIP5 simulations of the North American Monsoon misrepresented aspects of the seasonal cycle of precipitation and overestimated the peak monsoon rainfall (Geil et al., 2013; Sheffield et al., 2013a). Most CMIP5 models simulated an earlier onset date, but improved from CMIP3 since the onset date showed a clear separation of rainy and dry seasons in daily precipitation time-series. In contrast, the simulated retreat date was unclear in most models which highlighted problems for these models to simulate the regional changes during retreat stage (Geil et al., 2013; Sheffield et al., 2013a).

Line 67: Be specific as to what the CMIP5 models have improved upon. Presumably it is the CMIP3 models. A more specific and detailed description of biases in the CMIP5 cohort for the 3 regions is given.

Table 1: Which version of the TRMM algorithm is used? V7 for example is known to perform better over orography such as the Andes (see Zulkaffi et al., 2014, <https://doi.org/10.1175/JHM-D-13-094.1>).

We use the product from satellite 3B42, algorithm V7, the table now clarifies the version used.

Line 96/97: What is the evidence that TRMM provides the most reliable source of information on rainfall for this region? Are there citable studies intercomparing satellite, gauge and merged datasets for the NAMS and/or SAMS?

There are scarce studies that compare precipitation datasets in these regions and in-situ ground based stations managed by local governments have a short record or calibration problems, therefore there is hardly evidence to support the original statement of the manuscript. As the original sentence then lacked support from the evidence, the new manuscript now simply argues that TRMM is used as it has been considered by literature (cited in the manuscript) as a reliable source of information about the spatial and temporal characteristics of precipitation and therefore typically used in GCM evaluation in this region. Furthermore, we do point the reader to relevant comparison studies over several regions of the AMS as follows:

The TRMM dataset has a high horizontal and temporal resolution and was used in several CMIP assessments (Geil et al., 2013; Jones and Carvalho, 2013) as a reliable source of precipitation (Carvalho et al., 2012). Therefore, we use TRMM as our best estimate for the spatial and temporal characteristics of the AMS rainfall. However, the period covered by TRMM (1998-2018) is too short to analyse statistically robust teleconnections or variability, so we use GPCP, GPCC and CHIRPS for their longer period. Although a thorough validation and comparison of these datasets across the AMS domain is missing, several studies have analysed one or more of these datasets in regions of the AMS (e.g. Franchito et al., 2009; Dinku et al., 2010; Trejo et al., 2016).

Lines 100-124: Note that the ocean model horizontal resolutions have not been listed.

The corresponding ocean model horizontal resolutions are now listed in these lines.

Line 129: Clarify whether this is surface temperature or surface-air (i.e. 1.5 or 2 metre)temperature that is being considered.

We are using 2-m near surface air temperature. Table 1 and this section now makes clarifies this point.

Line 132: The Welch t-test should be defined in the methods or referenced here. How does this differ from a student's t-test? Plus, how are the different ensemble members dealt with relative to this?

A reference and explanation about the use of the Welch t-test is now given in this line. The p-value is estimated from each ensemble member and these p-values are then combined into a single p-value using Fisher's method (Fisher, 1992). We have thus included the following the lines suggested by the reviewer:

“Only statistically significant differences are shown, according to a Welch t-test (Wilks, 2011), which accounts for the difference in sample size and variance between model and observations/reanalysis data. The significance for simulations with multiple ensemble members is estimated first for each ensemble member and then combined into a single probability or p-value using Fisher's method (Fisher, 1992).”

Line 137/138: Does the stronger Bolivian LLJ support a stronger seasonal cycle/monsoon in the region north of the equator in South America during boreal summer? (I.e. in the South America component of the NAMS.)

Although the regions north of the equator do experience a monsoonal climate as defined by Wang et al. (2017) they are not comprised in North American Monsoon Literature. The stronger Bolivian LLJ is suggestive of stronger moisture transport to the south-eastern part of the South American Monsoon and would also suggest more rainfall than observed in this region while also drying the Amazon. The manuscript now reads:

”The South America Low-Level Jet, the low-level northwesterly flow in Bolivia, observed in Figure 1a, is stronger in the simulations. This stronger than observed jet is suggestive of a stronger moisture transport to the La Plata Basin, with has been associated with a drying of the Amazon and positive precipitation anomalies at the exit region of the jet (Marengo et al., 2012; Jones and Carvalho, 2018).”

Line 147/148: The physical outcome of this needs to be made explicitly clear to the reader, namely it appears that the inclusion of Earth System processes makes no difference to the SAMS.C3

Done. The manuscript now reads in these lines:

”The inclusion of Earth System processes appears to make no improvement on the low-level circulation biases.”

Line 149/150: A better summary of the changes in historical forcing (compared to the pre-industrial) needs to be described in lines 119-124 in order for the reader to be able to understand possible changes. Clearly the reader will know that global GHG emissions have increase, but what are the relevant/local patterns of aerosol emissions,land-use change etc. between the two experiments?

A more detailed description of the differences between the historical and piControl experiments is given

in section 2.2:

In contrast to the pre-industrial control experiments, the historical experiments use time-varying aerosol and greenhouse gas emissions and land-use change (Eyring et al., 2016). In Latin-America, land-use change for agricultural purposes have dramatically decreased tree cover in Central America and south-eastern Brazil since the 1950s (Lawrence et al., 2012), thereby affecting the surface energy balance. The regional emissions of carbonaceous aerosols, nitrogen oxides and volatile organic compound in Latin American megacities are also considered in the historical experiments. These emissions are noteworthy, e.g., due to the impact of black carbon emissions by increased biomass burning in the Amazon and northern Central America (Chuvieco et al., 2008).

Line 150-152: Given the length of the pre-industrial control integrations that are available (and given the small size of the forcing when compared to the historical experiment), the internal variability of quantities such as those listed here (and elsewhere through the results) within the pre-industrial should be considered as a means to understanding the significance of any change.

Both in the case of Figure 2e,f and Figure 7,8 h, the differences between historical and piControl have been shown only where the historical experiments shows a statistically significant difference from the piControl variability, as defined by a Welch t-test between the two experiments.

Line 175: I understand the logic, but the chosen model comparison mixing UKESM with the GC3 model appears rather unclear.

The choice of model comparison was based on the fact that the four low resolution simulations (GC3 N96-pi, GC3-hist, UKESM1-pi and UKESM-hist) were virtually indistinguishable for precipitation, ITCZ and low-level circulation biases. Comparing the low resolution coupled model with the medium resolution coupled or the AMIP simulation provides a better. For brevity, we now compare one coupled low resolution simulation with the coupled medium-resolution and the AMIP simulation. The manuscript now clarifies that this choice of simulations shown was based on showing the main biases and the differences.

Line 193: In what way is the low-level wind structure biased?

The manuscript now describes the wind biases:

The modelled low-level wind in the coupled model structure shows significant biases near the ITCZ. These wind biases are observed as stronger wind vectors converging toward the ITCZ during boreal summer and spring and stronger wind vectors diverging away from the equator during boreal winter.

Lines 171-222 and onwards: All of the comparisons whether maps or seasonal cycles would benefit from a table of quantitative comparisons between the various datasets, such as pattern correlations (or just correlations for the seasonal cycles) and RMSE. This is standard practice in multi-model evaluation studies.

Figures 1, 2, 7, 8 and 9 now show correlation and pattern correlation coefficients and RMSE.

Line 239: That the AMIP models “removed the spatial patterns” is strange wording. Did any bias remain at all? Generally, I think that this study could be significantly strengthened if a fuller comparison

could be made between AMIP runs of these two models (which will be available as contributions to the CMIP6 DECK) could be thoroughly compared with the coupled historical runs. The absence of SST bias would make for improved understanding.

The manuscript now includes results from the HadGEM3 GC3.1 AMIP simulation run at low resolution N96. The discussion is now updated to highlight the biases that are removed when the SST biases are removed, mainly the dry Amazon bias. However, biases in Central American rainfall and in the North American Monsoon are not improved even with "the right" SSTs.

Line 253: Here the run is referred to as "high-resolution" yet in the abstract it was medium resolution. The consistency within the manuscript needs to be improved. Could the manuscript not also examine a higher resolution version of the GC3 experiment, e.g. at N512?

The manuscript is now consistent with the wording of Williams et al. (2018), Menary et al. (2018) as to refer to the simulations as low (N96) and medium (N216) resolutions. Indeed the higher resolution simulation could be examined and compared, although long runs, pre-industrial or historical, at that resolution are not available and can therefore not be directly compared to the experiments used in this study or with observations.

Line 262: Are there any published onset measures for the AMS that could be used to measure this? And how is the onset objectively defined from Figure 9b? E.g. 1mm/d threshold, or the maximum rate etc.?

There are some studies that analyse onset and retreat timings in precipitation time series or using other metrics such as OLR in the AMS. However, most of the methods are not suited to address model output as the required fields are not all provided by the modelling centres or are tailored to be used in one specific dataset and using these methods in model output requires further statistical treatment. Ongoing research by the authors aims to cover this shortcoming in the literature by presenting a robust method that can use precipitation time series from different datasets (observations, model, reanalysis) and in different monsoon regions. To address the specific comment of the reviewer, the statement in the manuscript now clarifies that onset timing is merely qualitatively well represented by the models.

Lines 256-287: In the tropics, and especially for monsoons, I would expect the sea-sonal cycle of precipitation to be discussed in the context of the lower tropospheric circulation. This doesn't necessarily need to be done in the same paragraphs (the lay-out here is fine), but at the very least I would expect the discussions of precipitation biases here to reference the circulation biases for consistency. This is because of the intimate connection between circulation and precipitation in the tropics: winds providing moisture to the monsoon and the monsoon heating feeding back on the circulation to bring more moisture. At present the discussion is kept very separate. This could be aided by adding wind vectors to Figures 7 and 8.

The wind vectors have now been added to these Figures. Furthermore, the description of these figures and the discussions now couples the circulation and the precipitation to highlight, for instance, the relationship between the moisture transport away from the Amazon into southeastern Brazil and a corresponding

dry Amazon bias and a wet southeastern Brazil bias in these models.

Lines 256-287: It would be preferable to have some contextual comparison with other contemporary models (or at least CMIP5). How did CMIP5 perform for the NAMS and SAMS (cite references)? Do the UKMO models here fit within that envelope or are they better/worse? This will help improve the level of interest in this study outside the single modelling group. Furthermore, can the authors state how the current UKMO model versions (especially GC3.1) have advanced upon earlier versions (HadGEM3, HadGEM2-ES, even HadCM3) with respect to the AMS? Are there any published works mentioning those models? It would be useful for the community to understand if the simulation is being improved or whether significant biases are persisting.

We now provide context to assess whether these models have improved, which biases have been removed and which have persisted, with references, in the discussion section and for each monsoon region. For example for the North American Monsoon:

These results suggest model improvement on the simulation of the North American Monsoon from previous versions of the MOHC models (Arritt et al., 2000), and most of the model cohorts of CMIP3 and CMIP5 (Geil et al., 2013). For example, most of CMIP5 models showed a very wet bias during monsoon maturity whereas rainfall during monsoon maturity in all the experiments of this study within 1 mm day<sup>-1</sup> of observations. However, these models continue to show biases during monsoon retreat as rainfall does not decrease as sharply as in observations after mid-September.

Line 288: In the deep tropics, OLR is not really going to tell us much more than we already learn from precipitation, since much of the convection is deep. What is the nature of convection in the regions discussed? If any particular regions are dominated by shallow convection/warm rain, then this could be highlighted by references to relevant published works.

While we generally agree with this reviewer's comment that in the deep tropics during the wet season of each monsoon, OLR is highly correlated with precipitation and virtually indistinguishable, Fig. 10 does show interesting differences in OLR and  $\omega$  between model and reanalysis that do not agree with the precipitation. Particularly in the MSD region, the first peak, MSD and second peak characteristics in precipitation do not agree with OLR. The OLR would suggest a relatively similar first peak magnitude in the simulations and a weaker second peak than observed, however, the simulated 'precipitation shows a significantly wetter (Fig. 9) first peak and very similar second peak compared to both TRMM and ERA5 precipitation. The analysis of OLR,  $q$  and  $\omega$  may point to model biases in the treatment of convection and potential feedbacks. The height of convection influences the radiative balance, whereas characterising the strength of ascending and mid-level moisture aids to evaluate several aspects of the model's convection and microphysical schemes.

Line 297: How certain can we be about the tropospheric moisture in any case in reanalysis? What level of data is assimilated in some of these remote regions? Can any ground-truthing (really air-truthing!) be performed (even if not shown) using nearby RS launches such as those publicly available from Wyoming?

According to the Wyoming website and the NOAA station archive, regular soundings have been made in Manaus and Leticia (in the Amazon region), at Empalme, Sonora, México (core North American Monsoon), at Guatemala City and San Cristobal de las Casas, Mexico (in the MSD region) and at Sao Paulo and Brazilia (southeastern Brazil) at least since 1979. These radiosonde observations are assimilated twice a day into ERA-5. Although scarce and not as widespread as in other regions these are valuable input into ERA-5 and while not ground truthing over the whole domain of each monsoon region, these are the best estimates of tropospheric moisture available and therefore, arguably, makes ERA-5, and other reanalyses, a good standard to compare against. Analysing reanalysed and modelled tropospheric moisture where no RS launches are assimilated into the reanalysis would in fact be subject mostly to the reanalysis model driving the variables, for example over the ocean. We hope that showing that there have been RS launches assimilated into ERA5 in all the regions analysed of this study would answer this reviewer's concern. A more thorough comparison between ERA-5 and RS would be most beneficial but outside the scope of our study.

Line 328: Unlike the implication in the abstract, there is no assessment made hereof general ENSO behaviour in these coupled models – and if the driving point of ateleconnection is faulty then resultant impacts over the AMS will hardly do well. A summary of the behaviour of ENSO in these models with reference to a published assessment of their performance should be made.

This is an interesting and recurrent point by this reviewer. Menary et al. (2018) showed that the EN3.4 index has a similar power spectrum in the pre-industrial control experiments (see Figure 1 of this document) when compared to observations. The models also show a good representation of the perturbation to the Walker circulation by ENSO events (see Figure 2 of this document). The main patterns of variability (Figure 3) are also reasonably reproduced, particularly by the medium-resolution simulation. Of particular importance to the study at hand is ENSO diversity and the impact each different ENSO event has on the rainfall of the American Monsoon System. The characteristics of ENSO in these models are now summarized in section 5 in the manuscript and several of these figures have been added to a Supplementary information document that accompanies the manuscript.

Line 332: Is this in units of temperature (degC/K) or a normalised index in terms of standard deviations? Where is the index taken from or how have you calculated it?

The index has units of K, and was estimated from the HadSST dataset in the El Niño 3.4 region, as described in line 333 of the original manuscript. The figure now shows the units of the index.

Line 334: What are the years included in the observed composites of El Nino and LaNina? Has the impact of CP and EP El Nino events been considered and what does the published literature say about the different impacts of such events on the NAMS and SAMS?

Cai et al. (2020) and references therein show that ENSO teleconnections to SAMS depend on the type of ENSO, as shown by their indices (see another response and figures 3-6 below). For instance, Figure 4 of this document shows that GC3 N216 has ENSO events well represented in all the quadrants of the PC



space. We now included a new figure (Figure 6 of this document and new Figure 13 of the manuscript) comparing observed and modelled responses to CP and EP ENSO events. This analysis would of course be improved by analysing ENSO diversity in future projections and providing a more thorough analysis of ENSO diversity, for instance, measuring the skewness in the PC space, but we considered this to be outside the scope of this study.

Line 351: It would be very instructive if wind vectors were added to Figure 12, enabling to reader to understand something of the mechanism by which ENSO controls rainfall anomalies in the AMS. The authors should then elaborate upon this in the text.

We agree with this reviewer’s comment, we added the wind vectors to this Figure, but found that this would overcrowd the figure and decrease clarity. It is important to note that the mechanisms for the teleconnection to the subtropics are different from the teleconnection to the equatorial Amazon and therefore the most relevant wind anomalies for each teleconnection take place at different levels of the atmosphere. Figure 2 of this reply shows the Walker circulation anomalies in circulation and moisture. The Amazon region anomalies are closely related to this perturbation to the overturning circulation whereas the subtropical regions are affected by the perturbation of ENSO to Rossby wave-trains and the subtropical jets. We have added this figure to the supplementary material.

Line 348-350: It’s not immediately obvious how the NAO links described are relevant to the study at hand. The authors should either make this clear or remove this text.

The boreal winter-time NAO has been shown to influence precipitation in Central American and the Caribbean (Giannini et al., 2000), as well as northern South America (Giannini et al., 2004). Therefore, capturing the response in the North Atlantic SLP field may be important to capture secondary aspects of ENSO teleconnections. The link is now explained in the manuscript as:

“While the models seem to be able to capture this response of the NAO, the simulated response is weaker than observed, which may be relevant to simulate a secondary effect of the NAO on Central American and northern South American rainfall (Giannini et al., 2000, 2004).”

Lines 365-370: The authors should consider whether the lack of nonlinearity in the modelled ENSO response reflects the lack of diversity of simulated ENSO in the model(e.g. the lack of distinct central Pacific or east Pacific events).

Figures 5 and 4 of this document show the spread of boreal winter SST patterns as measured by the principal component analysis, as shown by (Cai et al., 2020). The variability of these models appears to cover a range of ENSO diversity, except perhaps missing extreme events such as the 97-98 and 2015-2016. The patterns associated with Central and East Pacific positive ENSO events (Figure 5) agree with the patterns of HadSST. These figures have now been added to the Supplementary material and the main results are introduced in section 5 of the new manuscript, to validate the fact that ENSO diversity seems, to a first degree, well represented in these models. A more thorough analysis would better evaluate how different are EP and CP in the observations and in the simulations, using metrics such as skewness or

perhaps the degree of coupling of the SSTs to the Walker circulation.

In any case, the teleconnections of the different types of ENSO events to South America (shown in Figure 6) appear to be independent of the ENSO type in the simulations. This may be because the model diversity is not representative of the observed ENSO diversity in other metrics, or perhaps because the simulated SST patterns do not couple to the atmospheric circulation in the same way, but this warrants further analysis, outside of the scope of this study.

Line 376: The authors could be more explicit on the likely link between cloud cover and the warm bias in the SAMS domain. If precipitation is too weak, this should be stated explicitly. (Note there would also be a soil-moisture feedback as a result.)

The manuscript now makes the link between precipitation, cloud cover and temperature explicit:

In the Amazon, the simulations showed a warm bias (+2 K) during austral spring and summer, a typical feature of previous models (Jones and Carvalho, 2013), and a colder than observed southeastern Brazil. These biases were linked with decreased cloud cover and less rainfall over the Amazon and more high clouds and rainfall in southeastern Brazil (Figures 7 and 9). The low cloud cover, warm and dry Amazon biases are intertwined with the low-level circulation from the Atlantic into the South American continent. The biases in the circulation during austral summer were observed as a northerly flow anomaly over the central and southern Amazon, a feature that has been associated with a stronger moisture transport away from the Amazon (Marengo et al., 2012; Jones and Carvalho, 2018). During the period of maximum mean rainfall rates in February, the simulations can overestimate rainfall by 3 mm day<sup>-1</sup> in southeastern Brazil and underestimate rainfall in the Amazon by a similar rate.

Lines 376-380: Finish the sentence by making explicit how the land-sea temperature contrast may feedback on the monsoon.

Addressed in the previous comment.

Line 391: Make explicit whether the Ryu and Hayhoe study was using CMIP5 models.

Yes, the study used CMIP3 and CMIP5 models, the manuscript now makes this explicit.

Line 393: With reference to the earlier comment on the abstract, the authors should avoid the terminology of intraseasonal variability here since the MJO/BSISO have not been assessed. Done.

Lines 371-404: In the conclusions I would want to see a more thorough synthesis of the results (e.g. how all the meteorological components fit together) than a summary of each in turn. It would also be worth reflecting upon (if possible) how these models sit in comparison to published literature on the AMS in CMIP3/5 models or on earlier versions of UKMO models.

The discussion section has been changed significantly to address this comment. The new manuscript now discusses each region of the AMS separately; for each region a summary of the biases in circulation, temperature and precipitation is given, indicating where they might be linked and finally whether these CMIP6 versions are an improvement from previous versions of the UKMO and CMIP5 models.

Line 413: See earlier comments on higher/medium resolution. Done.

Line 418: Need to see a summary of how the Earth System processes influence the response to forcing.

While we do not provide a thorough summary of the Earth System processes, as we did not investigate them explicitly and may be outside the scope of our study, the manuscript does state:

“A relevant difference between UKESM1 and GC3 is that warming over the historical period in Mexico and the Amazon is higher in UKESM1 than in GC3. This warming may be a consequence of the land-use change in these regions playing a role in the UKESM1 representation of soil-atmosphere feedbacks.”

Figure 1: The domains used later in Figure 3 etc. need to be pictured somewhere, e.g. on this figure.

The domains are now shown in Figures 1, 7 and 8.

Trivia:

Lines 13/14: Perhaps replace “in subtropical America” [meaning USA?] with “in the subtropical Americas”.

To avoid confusion with native English speakers, we have opted to use the term “subtropical North and South America”.

Line 21: Change “copuled” to “coupled”. Done.

Line 42: “...and the dynamics the features largely characterise the MSD characteristics...”. I don’t understand what is meant here, something is wrong with the grammar.

Sentence has been reworded.

Line 43: Change “reproduce accurately” to “accurately reproduce”.

Line 51: Remove hyphen from “South-America”. Done.

Line 66: Space needed in “Met Office”. Done.

Line 119: Replace “beginning for” with “covering”; replace “that include” with “of”. Done.

Line 142: Change “temperature” to “temperatures”. Done.

Line 171: Second “the” is not required. Done.

Line 184: brackets not needed around location point. Done.

Line 195: By “a minimum” do you mean “southernmost position”? This would be easier to understand. Changed for “southernmost position”.

Line 302: Replace “indicative” with “are indicative”. Done.

Line 304: Clarify if the decreased omega is a reduction or increase in ascent.

Line 309: Mixture of singular and plural in this line. Done.

Line 331: By convention, “El” is not included when referring to the “Nino-3.4 index”. Done.

Line 362: Change “opposite sign response” to “opposite signed response”. Done.

## References

Adams, D. K. and Comrie, A. C. (1997), ‘The north American monsoon’, *Bulletin of the American Meteorological Society* **78**(10), 2197–2214.

- Arriitt, R. W., Goering, D. C. and Anderson, C. J. (2000), ‘The north american monsoon system in the hadley centre coupled ocean-atmosphere gcm’, *Geophysical Research Letters* **27**(4), 565–568.
- Cai, W., McPhaden, M. J., Grimm, A. M., Rodrigues, R. R., Taschetto, A. S., Garreaud, R. D., Dewitte, B., Poveda, G., Ham, Y.-G., Santoso, A. et al. (2020), ‘Climate impacts of the el niño–southern oscillation on south america’, *Nature Reviews Earth & Environment* **1**(4), 215–231.
- Fisher, R. A. (1992), Statistical methods for research workers, in ‘Breakthroughs in statistics’, Springer, pp. 66–70.
- Geil, K. L., Serra, Y. L. and Zeng, X. (2013), ‘Assessment of cmip5 model simulations of the north american monsoon system’, *Journal of Climate* **26**(22), 8787–8801.
- Giannini, A., Kushnir, Y. and Cane, M. A. (2000), ‘Interannual variability of Caribbean rainfall, ENSO, and the Atlantic Ocean’, *Journal of Climate* **13**, 297–311.
- Giannini, A., Saravanan, R. and Chang, P. (2004), ‘The preconditioning role of tropical Atlantic variability in the development of the ENSO teleconnection: Implications for the prediction of Nordeste rainfall’, *Climate Dynamics* **22**, 839–855.
- Jones, C. and Carvalho, L. M. (2013), ‘Climate change in the South American monsoon system: present climate and CMIP5 projections’, *Journal of Climate* **26**(17), 6660–6678.
- Menary, M. B., Kuhlbrodt, T., Ridley, J., Andrews, M. B., Dimdore-Miles, O. B., Deshayes, J., Eade, R., Gray, L., Ineson, S., Mignot, J., Roberts, C. D., Robson, J., Wood, R. A. and Xavier, P. (2018), ‘Preindustrial control simulations with hadgem3-gc3. 1 for cmip6’, *Journal of Advances in Modeling Earth Systems* **10**(12), 3049–3075.
- Vera, C., Higgins, W., Amador, J., Ambrizzi, T., Garreaud, R., Gochis, D., Gutzler, D., Lettenmaier, D., Marengo, J., Mechoso, C. R., Nogues-Paegle, J., Dias, P. L. S. and Zhang, C. (2006), ‘Toward a unified view of the American monsoon systems’, *Journal of Climate* **19**(20), 4977–5000.
- Wang, P. X., Wang, B., Cheng, H., Fasullo, J., Guo, Z., Kiefer, T. and Liu, Z. (2017), ‘The global monsoon across time scales: Mechanisms and outstanding issues’, *Earth-Science Reviews* **174**, 84–121.
- Williams, K. D., Copsey, D., Blockley, E. W., Bodas-Salcedo, A., Calvert, D., Comer, R., Davis, P., Graham, T., Hewitt, H. T., Hill, R., Hyder, P., Ineson, S., Johns, T. C., Keen, A. B., Lee, R. W., Megann, A., Milton, S. F., Rae, J. G. L., Roberts, M. J., Scaife, A. A., Schiemann, R., Storkey, D., Thorpe, L., Watterson, I. G., Walters, D. N., West, A., Wood, R. A., Woollings, T. and Xavier, P. K. (2018), ‘The met office global coupled model 3.0 and 3.1 (gc3. 0 and gc3. 1) configurations’, *Journal of Advances in Modeling Earth Systems* **10**(2), 357–380.

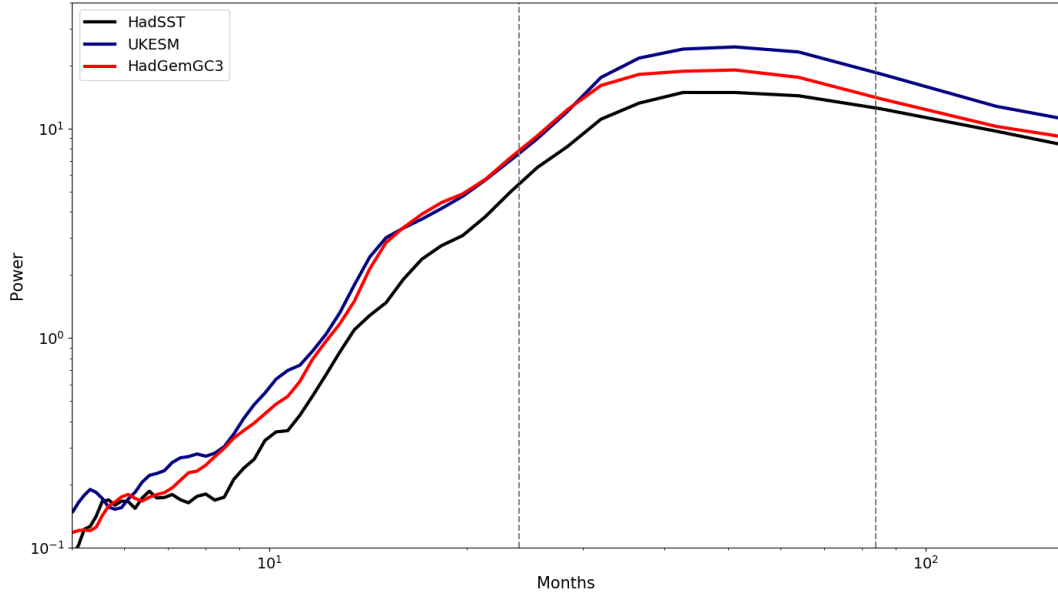

Figure 1: Power spectrum of the ENSO 3.4 index in pre-industrial control simulations of the HadGEM3 and UKESM1 models and HadSST data. The gray lines indicate the 2 and 7 yr period.

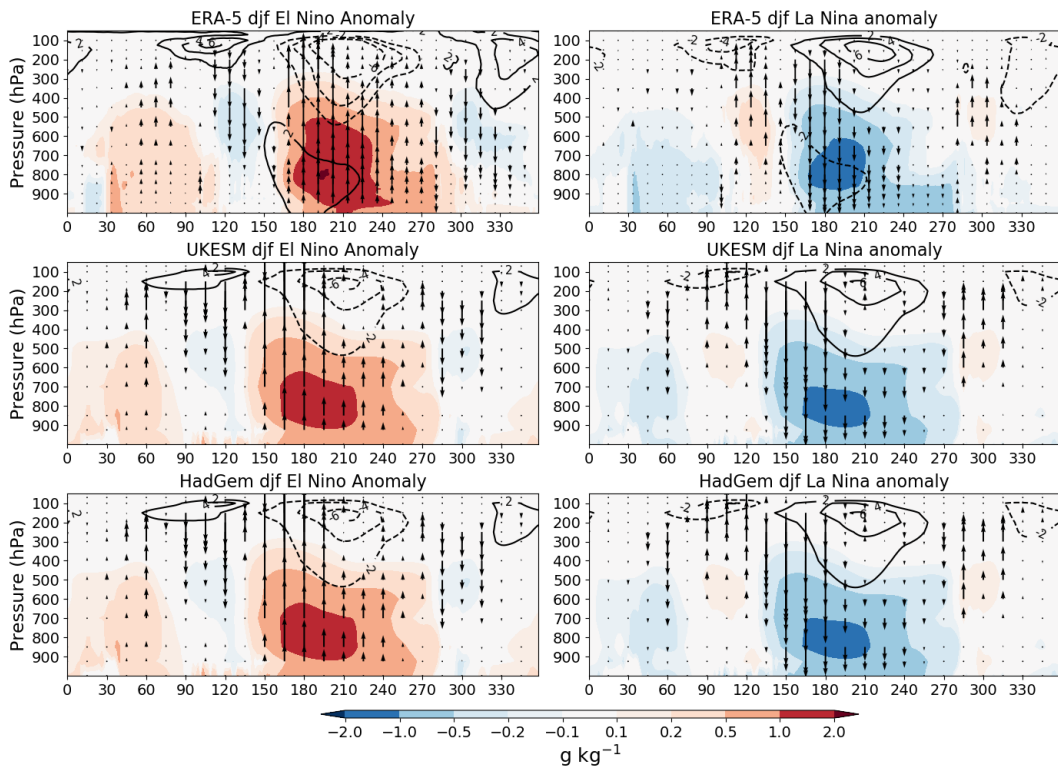

Figure 2: DJF Longitude-height Walker circulation anomalies of specific humidity (colour-contours),  $\omega$  (vectors) and zonal wind (line-contours) during El Niño events (left) and La Niña events (right). Results are shown for ERA-5 (upper), UKESM-pi (middle) and HadGEM3 piControl (lower).

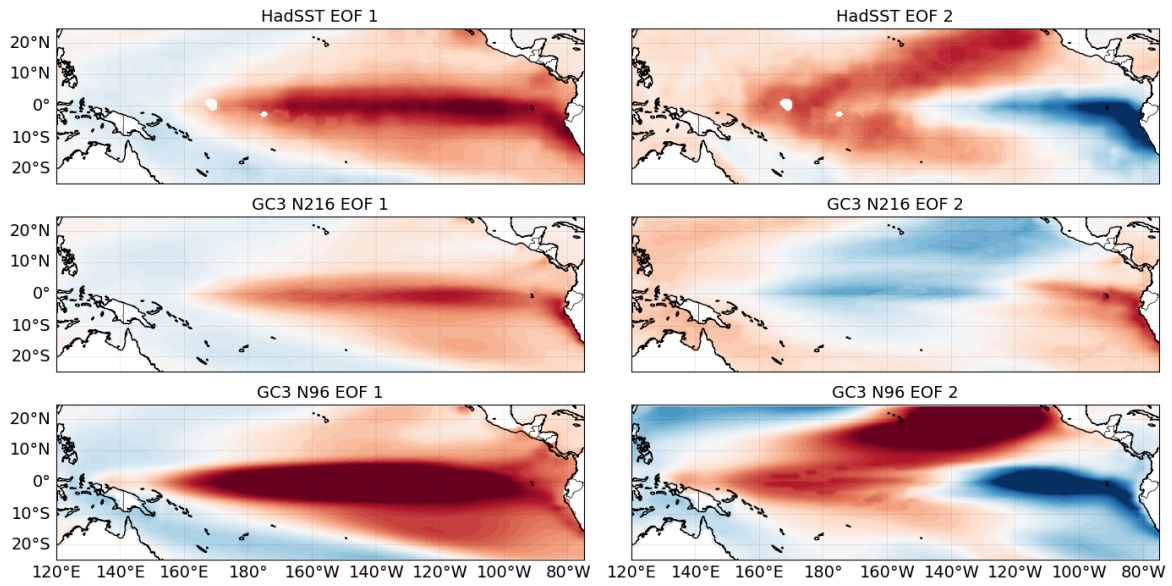

Figure 3: SST patterns [arbitrary units] of the two leading EOFs in HadSST, GC3 N216 and UKESM1.

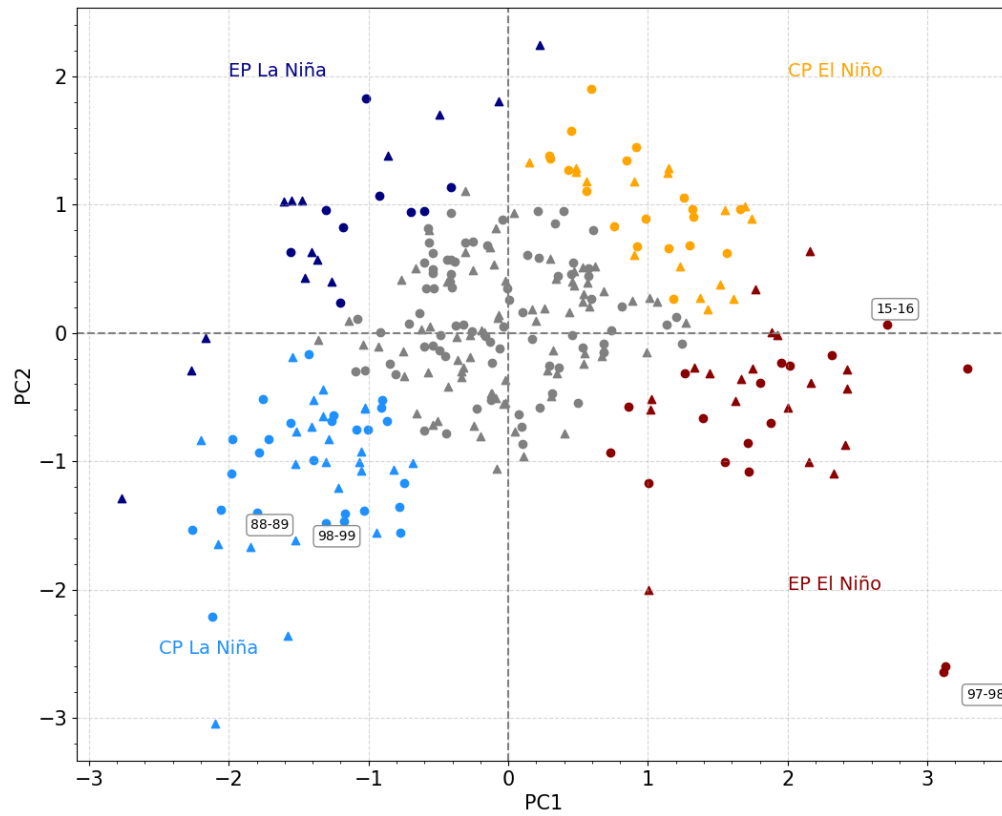

Figure 4: Principal component (PC) space of the first and second leading PCs of the deseasonalized Pacific SSTs diagram showing HadSST (circles) and GC3 N216 (triangles). The PCs are showing as DJF-means.

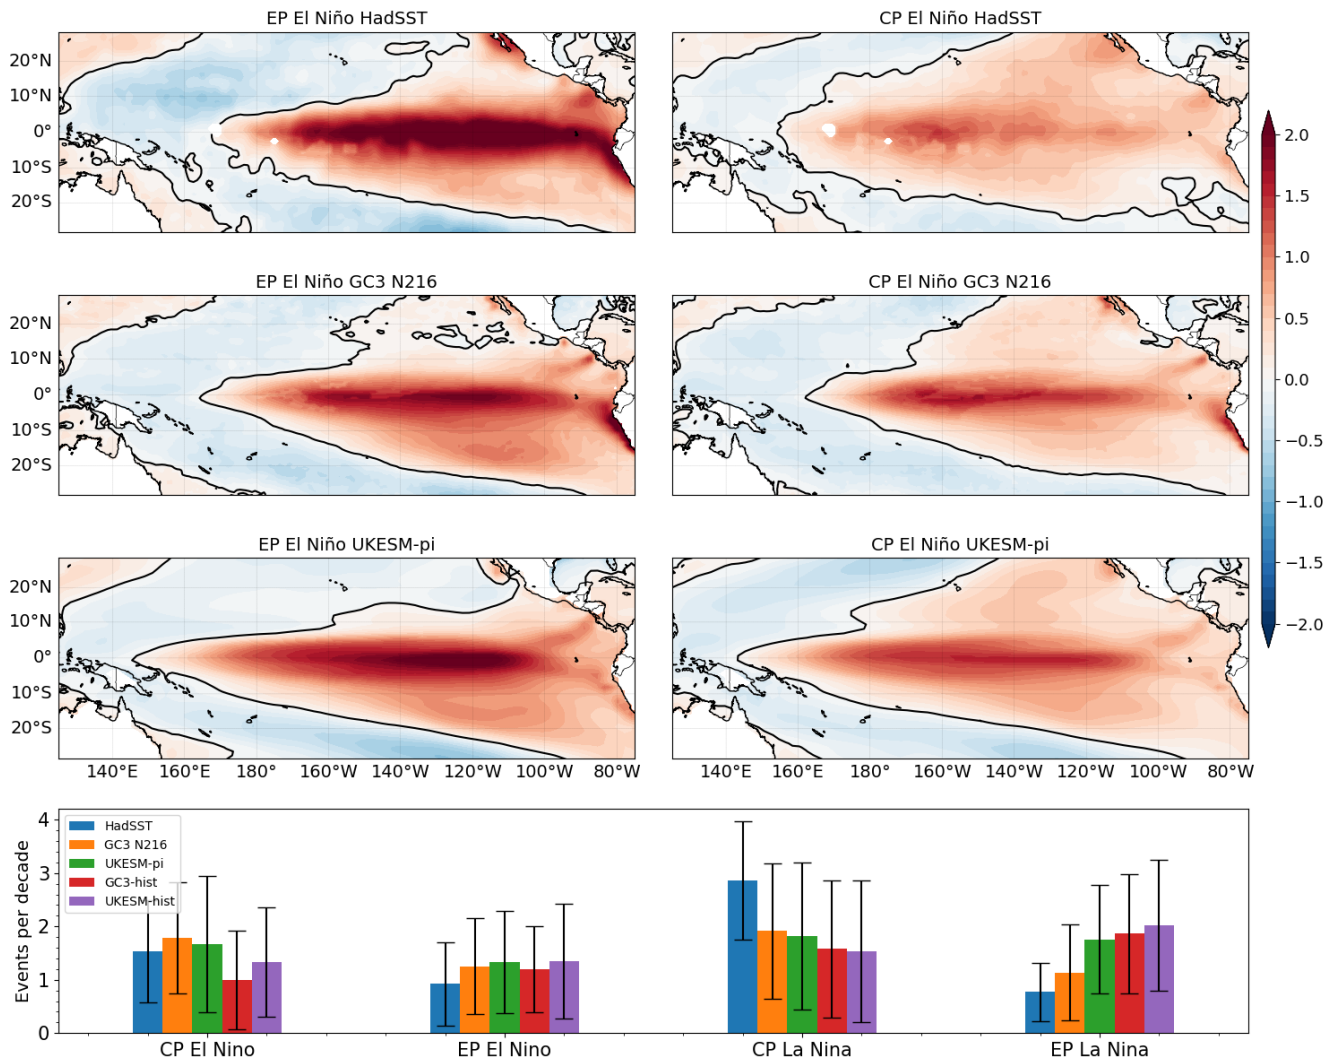

Figure 5: SST anomalies [K] for East Pacific (EP) and Central Pacific El Niño events in HadSST, GC3 N216 and UKESM piControl. EP (CP) events were defined where the E-index (C-index) was greater than 1. In the bottom panel, the frequency of events per decade (with standard deviation as error bar) is shown for HadSST and the simulations used in this study. The E-index is computed from  $(PC1 - PC2)/\sqrt{2}$  and the C-index from  $(PC1 + PC2)/\sqrt{2}$ .

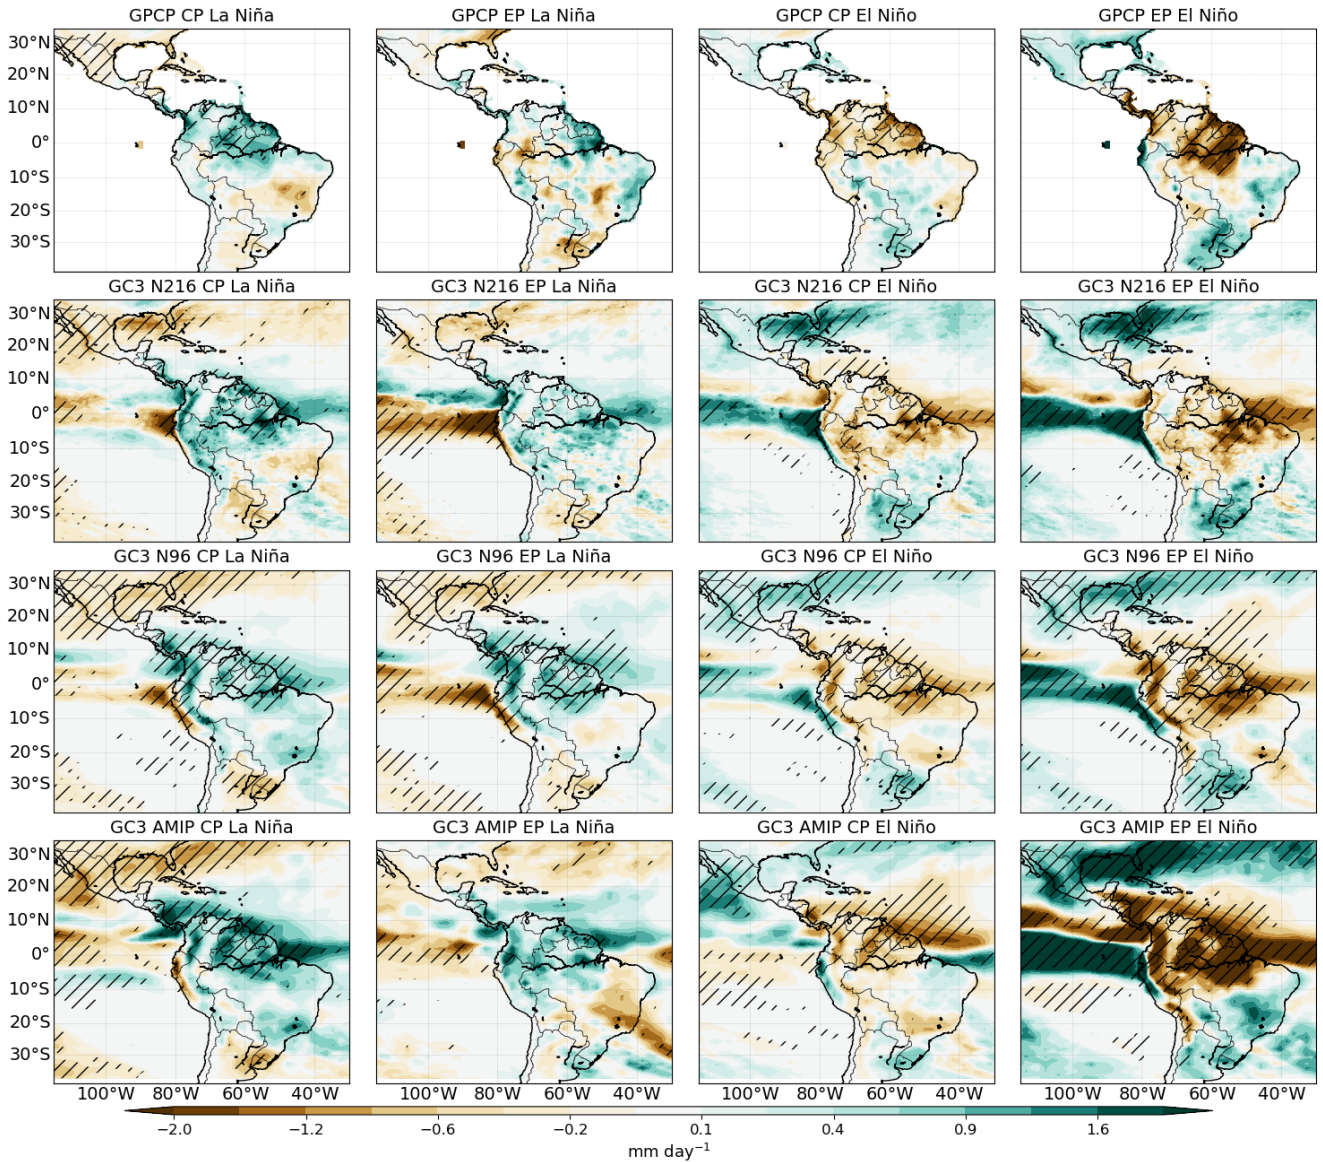

Figure 6: Precipitation anomalies in GPCP 1940-2013, GC3 N216, GC3 N96-pi and GC3 AMIP for the four different types of ENSO events, as defined by Cai et al. (2020). Statistically significant anomalies (95% confidence level) are hatched.
